# Supplementary material for: Selective recognition of the amyloid marker single thioflavin T using DNA origami-based gold nanobipyramid nanoantennas
Source: Royal Society of Chemistry journal article supplement (doi:10.1039/d2nr06389a), 2023-01-01
Supplement: d2nr06389a1.pdf [file d2nr06389a1.pdf]

## **Supporting Information**

### **Selective recognition of the amyloid marker single thioflavin T using DNA origami-based gold nanobipyramid nanoantennas**

Charanleen Kaur, Vishaldeep Kaur, Shikha Rai, Mridu Sharma and Tapasi Sen\*

Institute of Nano Science and Technology, Sector-81, Mohali, Punjab -140306, India

\*E-mail: [tapasi@inst.ac.in](mailto:tapasi@inst.ac.in)

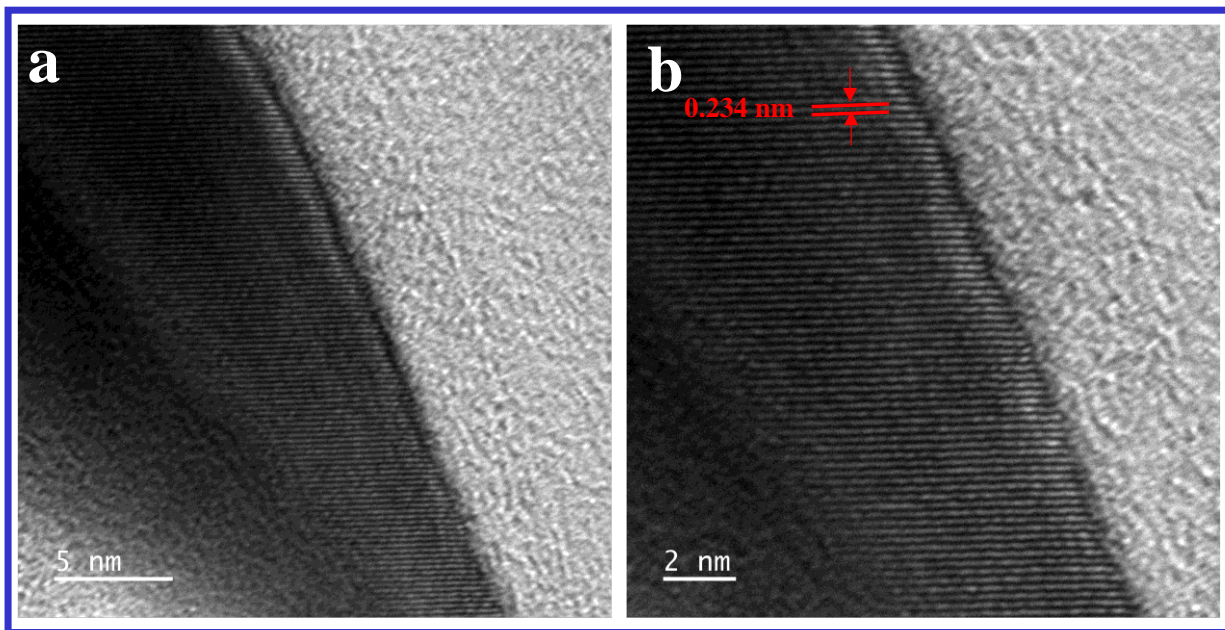

**Figure S1.** (a) and (b) HRTEM images of Au NBP.

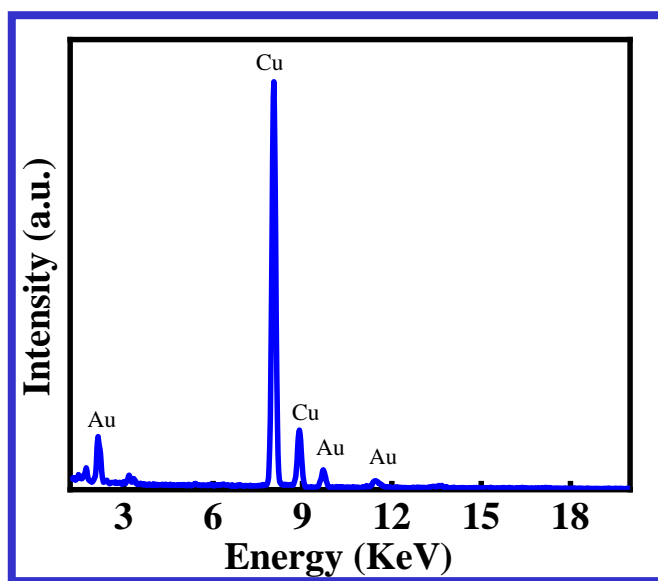

**Figure S2.** EDX spectrum of Au NBPs.

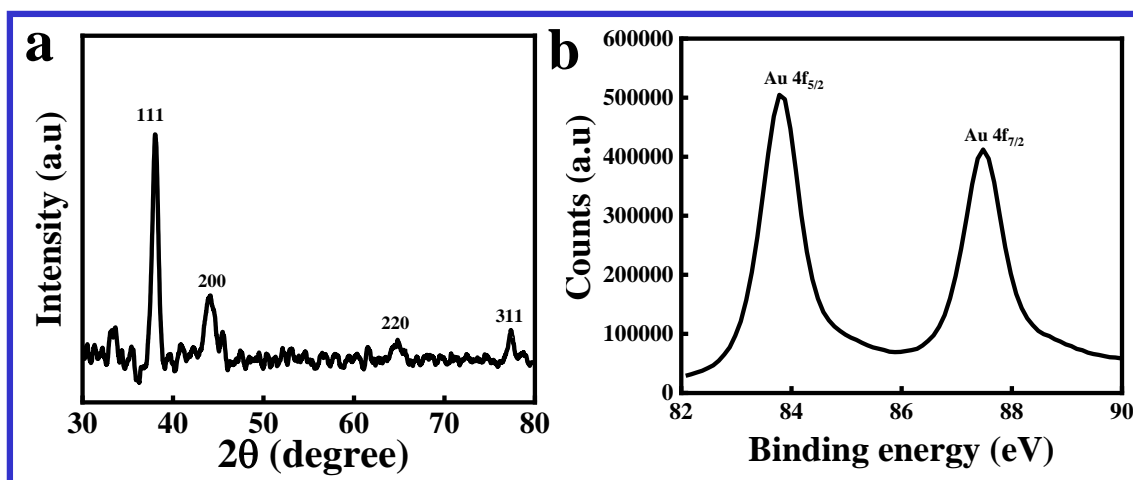

**Figure S3.** (a) XRD patterns, and (b) XPS spectrum of Au NBPs.

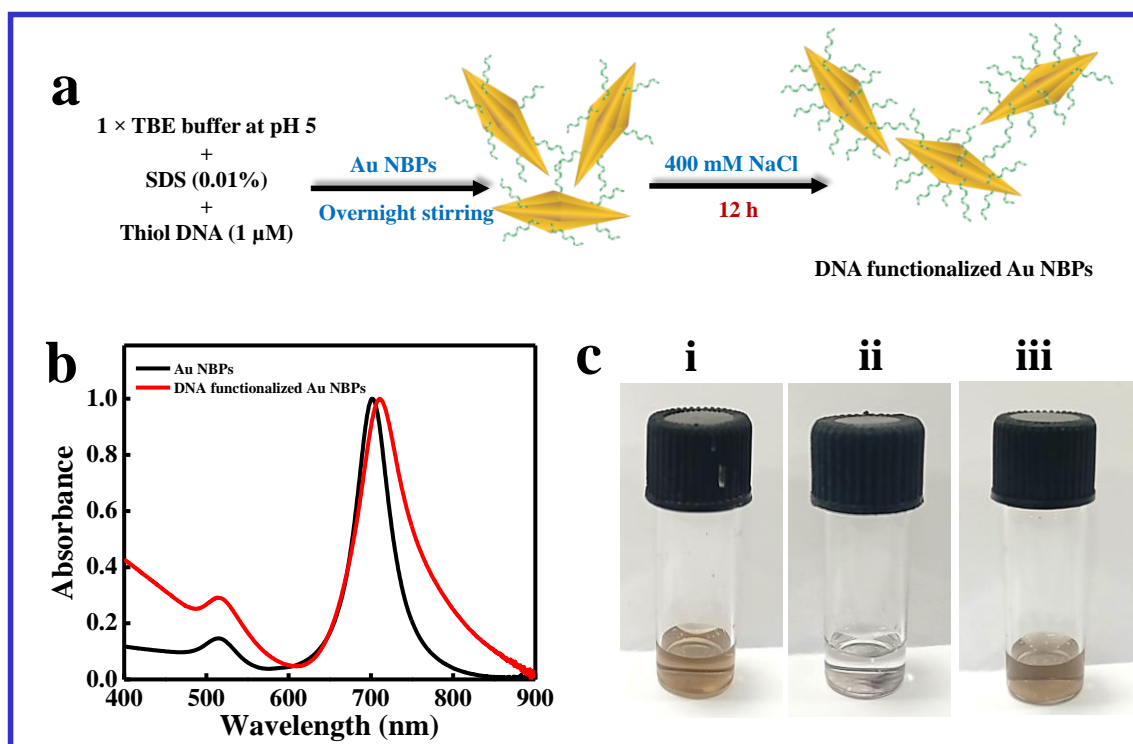

**Figure S4.** (a) Schematic illustration of DNA functionalization of Au NBPs, (b) Overlay UV-Vis spectra of Au NBPs and DNA functionalized Au NBPs, (c) Pictorial depiction of (i) Au NBPs, (ii) Au NBPs in presence of PBS, 500 mM NaCl, and (iii) DNA functionalized Au NBPs in presence of PBS, 500 mM NaCl.

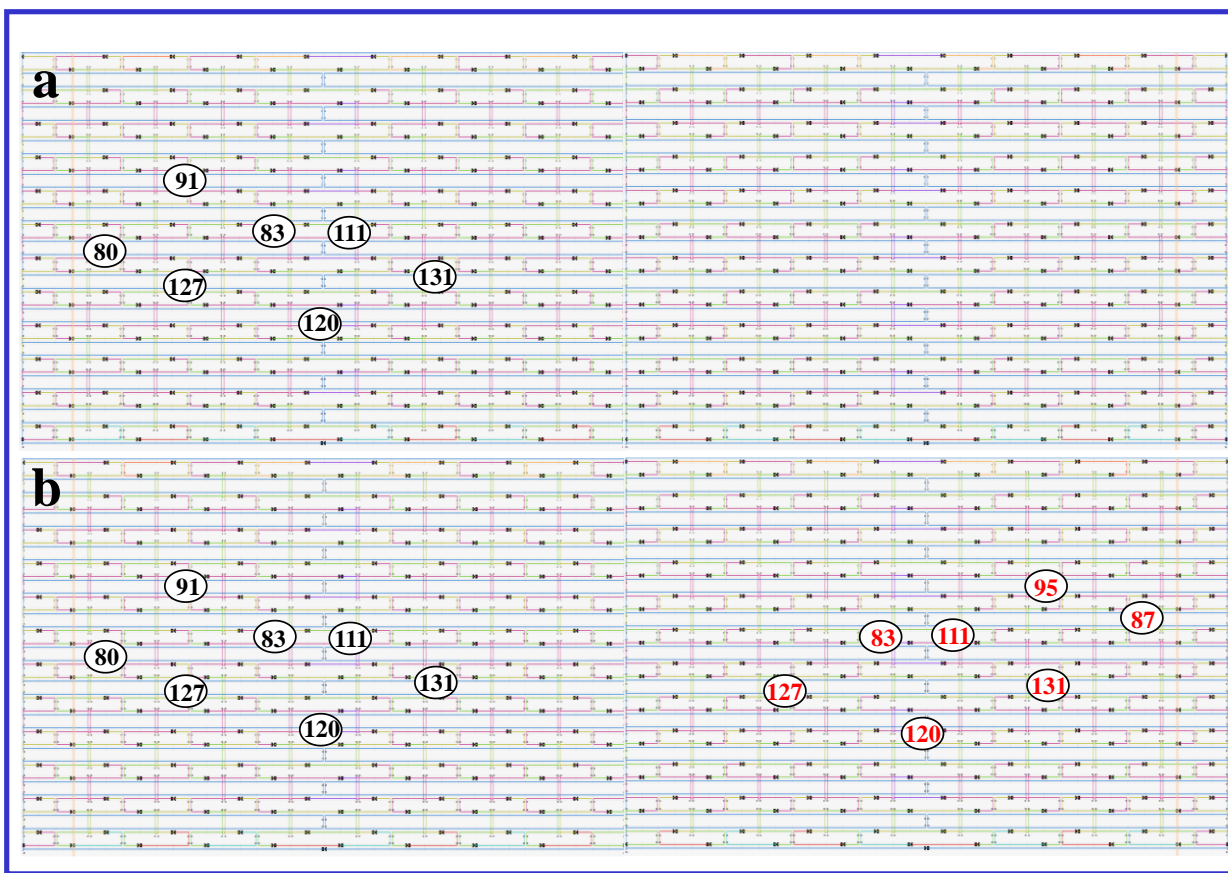

**Figure S5.** Capturing strands position for immobilization of Au NBPs (a) monomer, and (b) dimer on DNA origami.

**Table S1.** Thiol modified DNA sequences.

| Name | Sequence 5' to 3'           |
|------|-----------------------------|
| 1    | 5'-SH- CGTCGTATTCGATAGCTTAG |
| 2    | 5'-SH-TTGGTGGTGGTGGTGGTGGT  |

**Table S2.** Modified staple strand sequences on DNA origami.

| Na<br>me         | Sequence 5' to 3'                               |
|------------------|-------------------------------------------------|
| <b>Monomer A</b> |                                                 |
| 80               | AAACAGTTGATGGCTTAGAGCTTATTTAAATACCACCACCACCA    |
| 83               | AAGAGGAACGAGCTTCAAAGCGAAGATACATTCACCACCACCACCA  |
| 91               | TACCTTTAAGGTCTTTACCCTGACAAAGAAGTCCACCACCACCACCA |
| 111              | TTTCATTTGGTCAATAACCTGTTTAATCAATACCACCACCACCACCA |
| 120              | GCGTTATAGAAAAGCCTGTTTAGAAGGCCGCCACCACCACCACCA   |
| 127              | GGTAGCTAGGATAAAAATTTTTAGTTAACATCCCACCACCACCACCA |

|                                |                                                                           |
|--------------------------------|---------------------------------------------------------------------------|
| 131                            | AGGCGTTACAGTAGGGCTTAATTGACAATAGACCACCACCACCA                              |
| <b>Monomer B</b>               |                                                                           |
| 83                             | AAGAGGAACGAGCTTCAAAGCGAAGATACATTCTAAGCTATCGA                              |
| 87                             | CTTTACAGTTAGCGAACCTCCCGACGTAGGAACTAAGCTATCGA                              |
| 95                             | TATTTTGCTCCCAATCCAAATAAGTGAGTTAACTAAGCTATCGA                              |
| 111                            | TTTCATTTGGTCAATAACCTGTTTAATCAATACTAAGCTATCGA                              |
| 120                            | GCGTTATAGAAAAAGCCTGTTTAGAAGGCCGGCTAAGCTATCGA                              |
| 127                            | GGTAGCTAGGATAAAAATTTTTAGTTAACATCCTAAGCTATCGA                              |
| 131                            | AGGCGTTACAGTAGGGCTTAATTGACAATAGACTAAGCTATCGA                              |
| <b>G-rich Branching staple</b> |                                                                           |
| 106                            | GCTAAATCCGACAAAATTTTAGTCCGTGGTAGGGCAGGTTGGGGTGACTTTTT<br>GGTAAAGTAGAGAATA |

**Table S3.** Biotin modified staple strand sequences on DNA origami.

| Name    | Sequence 5' to 3'                          |
|---------|--------------------------------------------|
| Bio-11  | Biotin- TTGAGAATAGCTTTTGCGGGATCGTCGGGTAGCA |
| Bio-27  | Biotin-TTGGAAGCGACCAGGCGGATAAGTGAATAGGTG   |
| Bio-188 | Biotin- TTTGGTTTTTAACGTCAAAGGGCGAAGAACCATC |
| Bio-205 | Biotin- GCCAACAGTCACCTTGCTGAACCTGTTGGCAA   |

**Table S4.** Staple strand sequences for control measurements.

| Name  | Sequence 5' to 3'                                                                                                                         |
|-------|-------------------------------------------------------------------------------------------------------------------------------------------|
| DNA 1 | GCTAAATCCGACAAAAGGTAAAGTAGAGAATATTTT                                                                                                      |
| DNA 2 | GCTAAATCCGACAAAAGGTAAAGTAGAGAATAATTGTATGAGTAGAGA<br>TTTGTAAGAGCTGTTAGTTAGCTCGCTCAGCTAATAGTTGCCACACAA<br>CGTCAAAATTAGAGAACGGTCGTAACATTATCG |

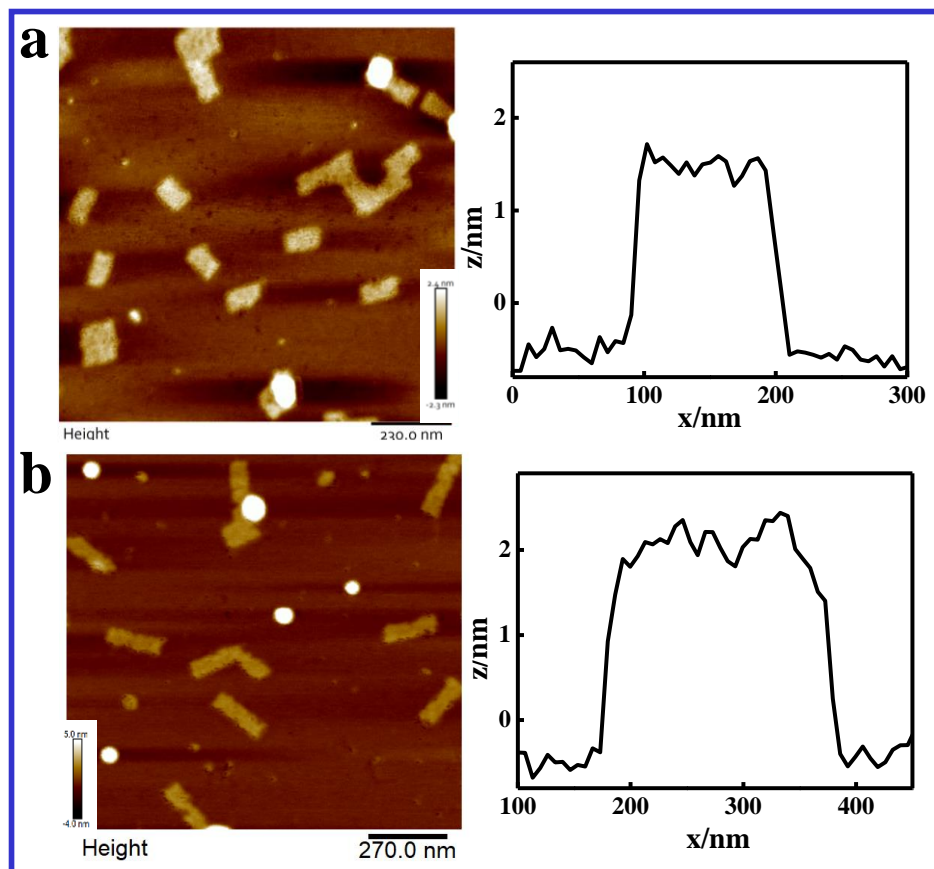

**Figure S6.** AFM images of DNA origami (a) monomer, and (b) dimer with corresponding height profiles.

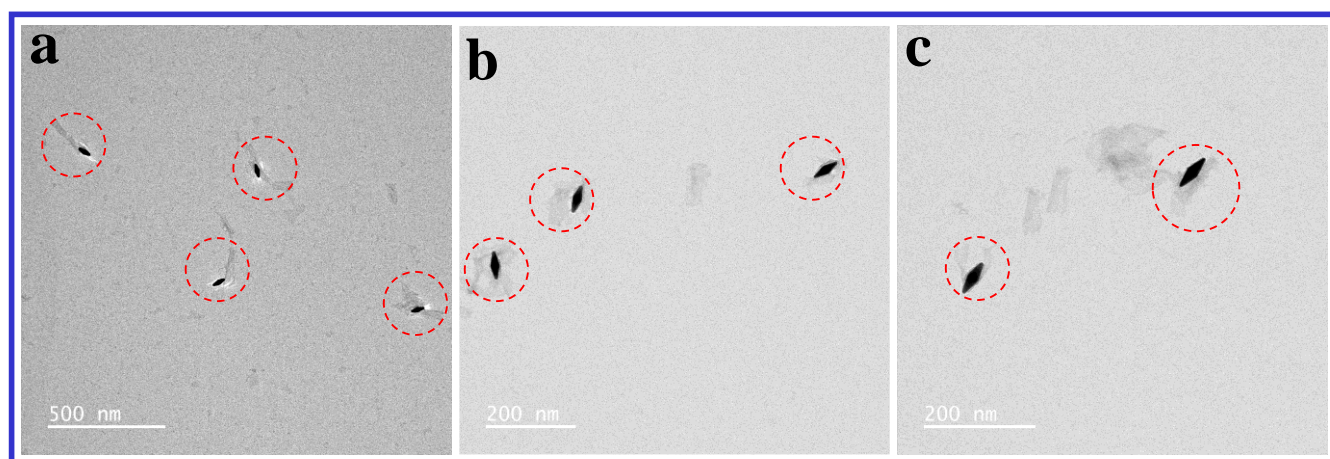

**Figure S7.** (a), (b), and (c) TEM images of Au NBP monomer on DNA origami.



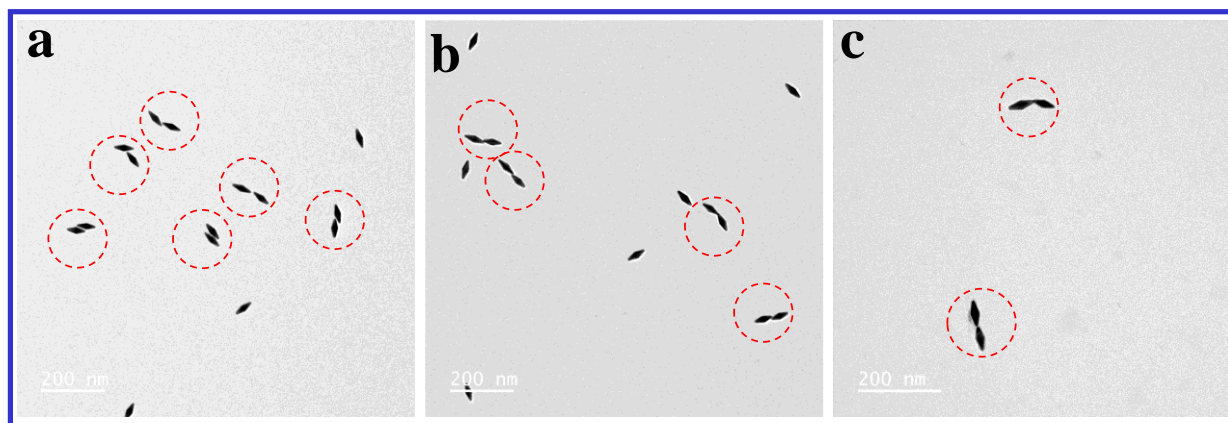

**Figure S8.** (a), (b), and (c) TEM images of Au NBPs dimer on DNA origami.

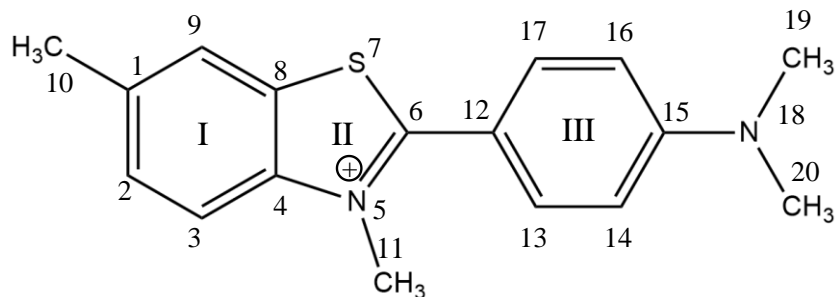

**Figure S9.** Structure of ThT.

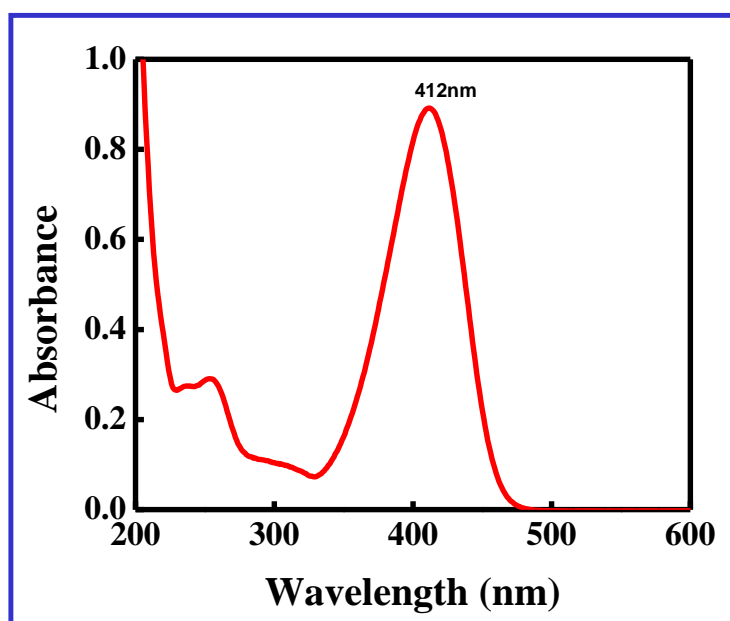

**Figure S10.** UV-Vis spectrum of ThT.

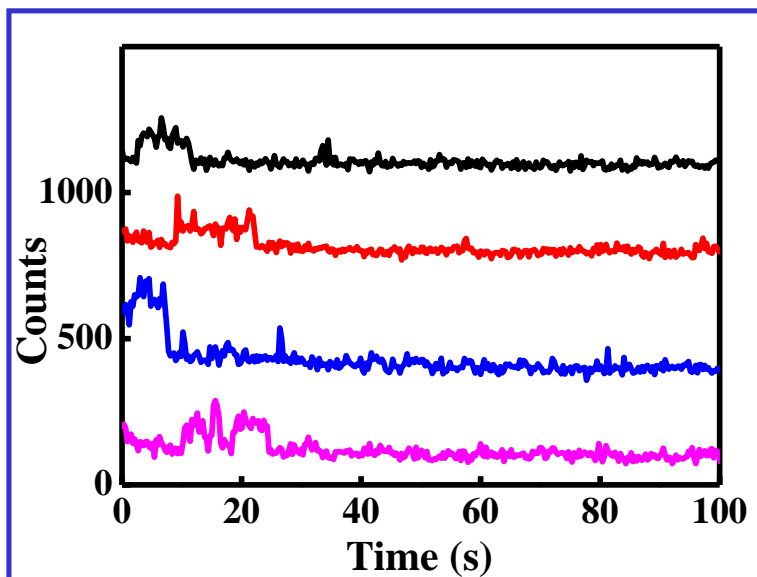

**Figure S11.** Time trace profiles of ThT dye molecule on DNA origami.

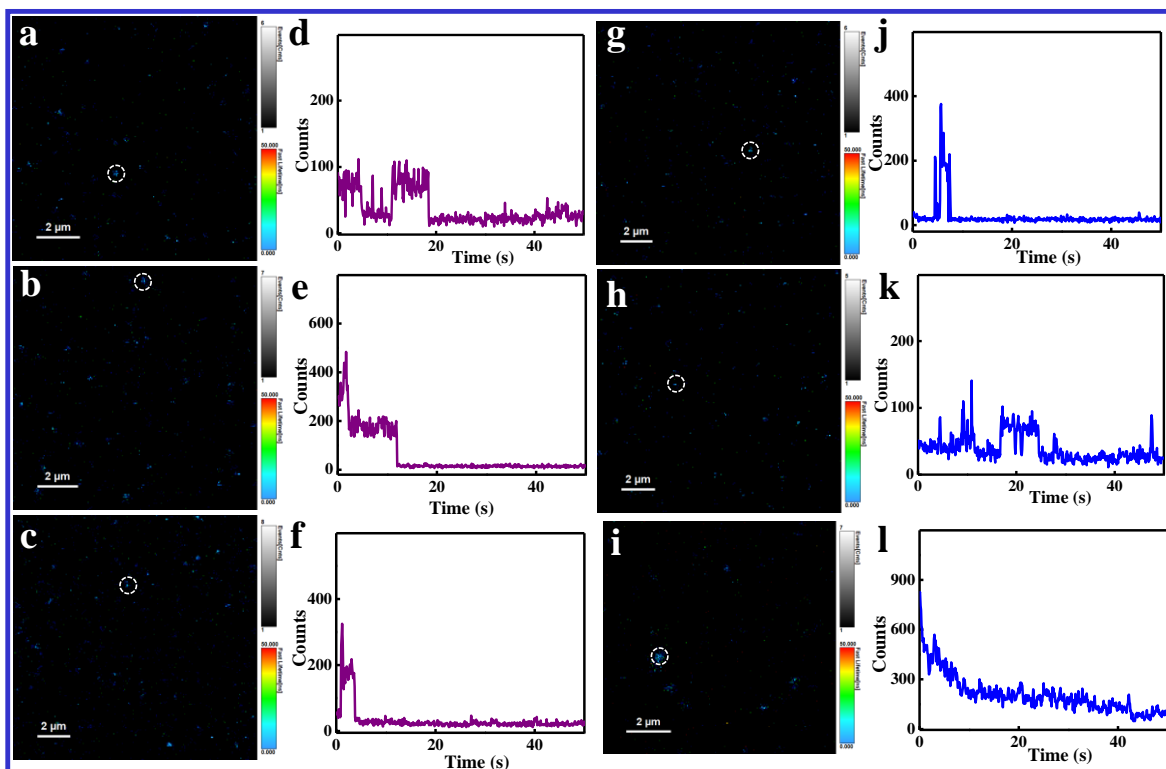

**Figure S12.** (a, b, c), and (g, h, i) FLIM images, and (d, e, f), and (j, k, l) corresponding time trace profiles for 40 nM ThT solution using Au NBPs monomer, and dimer on DNA origami, respectively.



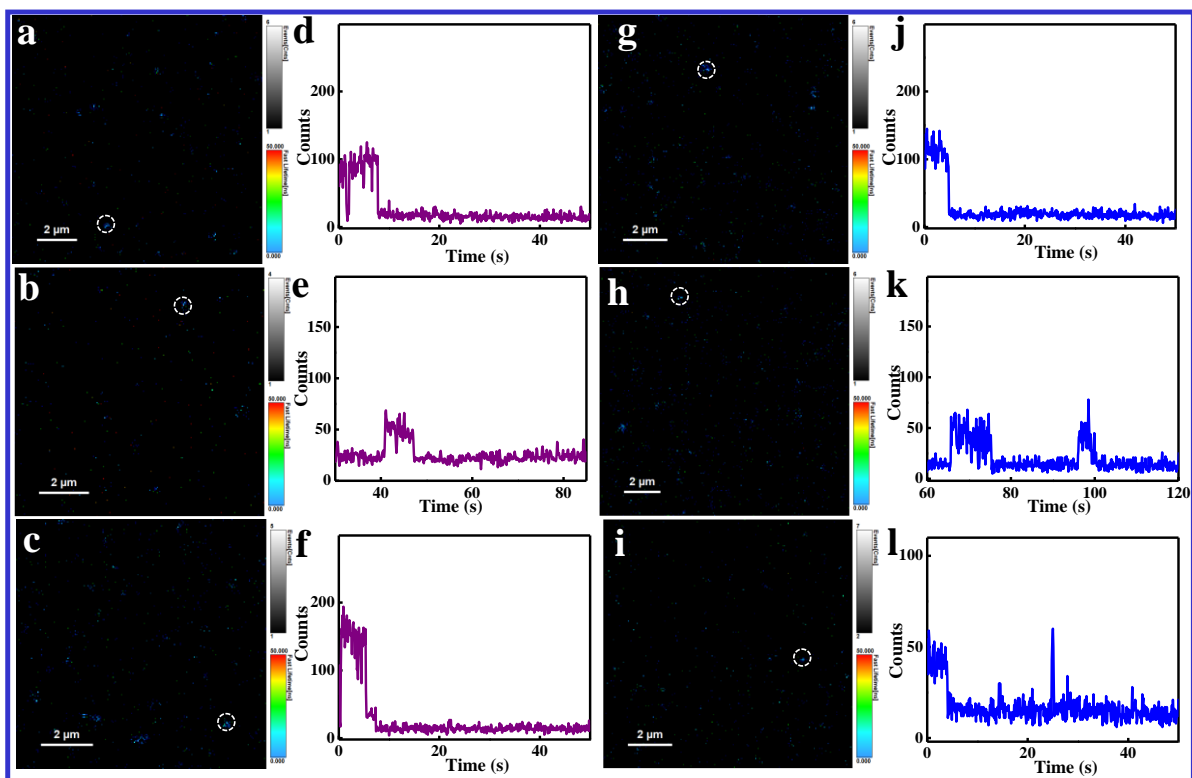

**Figure S13.** (a, b, c), and (g, h, i) FLIM images, and (d, e, f), and (j, k, l) corresponding time trace profiles for 20 nM ThT solution using Au NBPs monomer, and dimer on DNA origami, respectively.

**Table S5.** Calculation of distribution of number of ThT molecules on Au NBPs nanoantenna.

| Number of molecules | Yield (%) |
|---------------------|-----------|
| 1                   | 86        |
| 2                   | 9         |
| Multiple            | 5         |

**Table S6.** Assignment of SERS vibrations of ThT.

| Peak position (cm <sup>-1</sup> ) | Assignments <sup>1, 2</sup>                                                                                      |
|-----------------------------------|------------------------------------------------------------------------------------------------------------------|
| 700                               | $\delta_I(\text{CCC})/\nu(\text{C}_6\text{SC})$                                                                  |
| 742                               | $\delta(\text{CCC})/\nu_s(\text{C}_6\text{SC})/\nu_s(\text{CN}_{18}\text{C})$                                    |
| 794                               | $\rho(\text{CH}_3)c_{11}/\delta(\text{CCC})$                                                                     |
| 1033                              | $\delta_I(\text{CCC})/\nu_{III}(\text{CC})$                                                                      |
| 1129                              | $\rho(\text{CH}_3)c_{11}/\delta_I(\text{CH})/\nu(\text{CC})/\nu(\text{CSC})/\nu(\text{NCC})$                     |
| 1402                              | $\delta(\text{CH}_3)c_{11,10,19,20}/\delta_I(\text{CH})/\nu(\text{CC})$                                          |
| 1536                              | $\nu_{III}(\text{CC})/\nu(\text{C}_{15}\text{N}_{18})/\nu(\text{C}_6\text{C}_{12})/\delta(\text{CH}_3)c_{19,20}$ |
| 1600                              | $\nu_{III}(\text{CC})$                                                                                           |

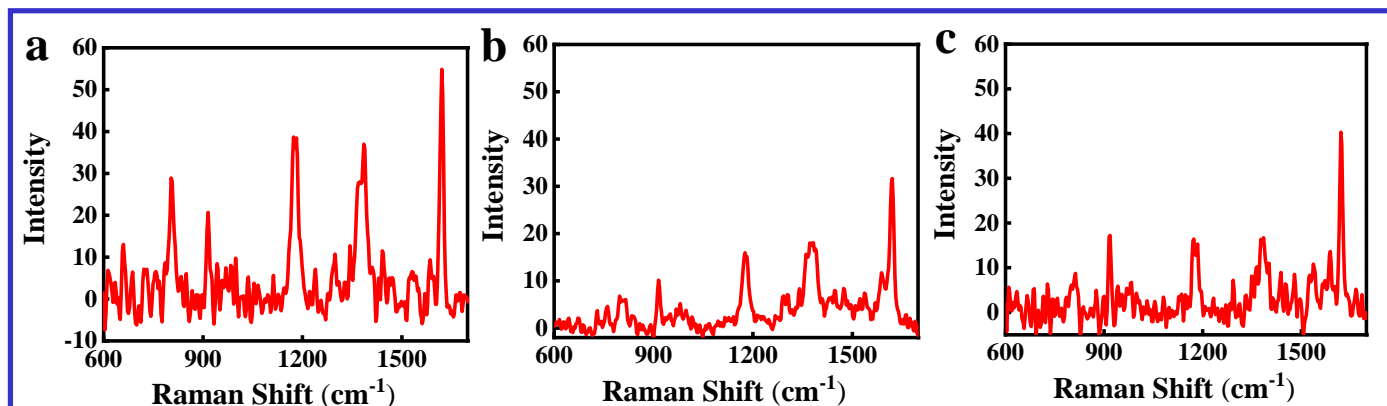

**Figure S14.** (a), (b), and (c) SERS spectra of ThT using Au NBPs dimer nanoantenna.

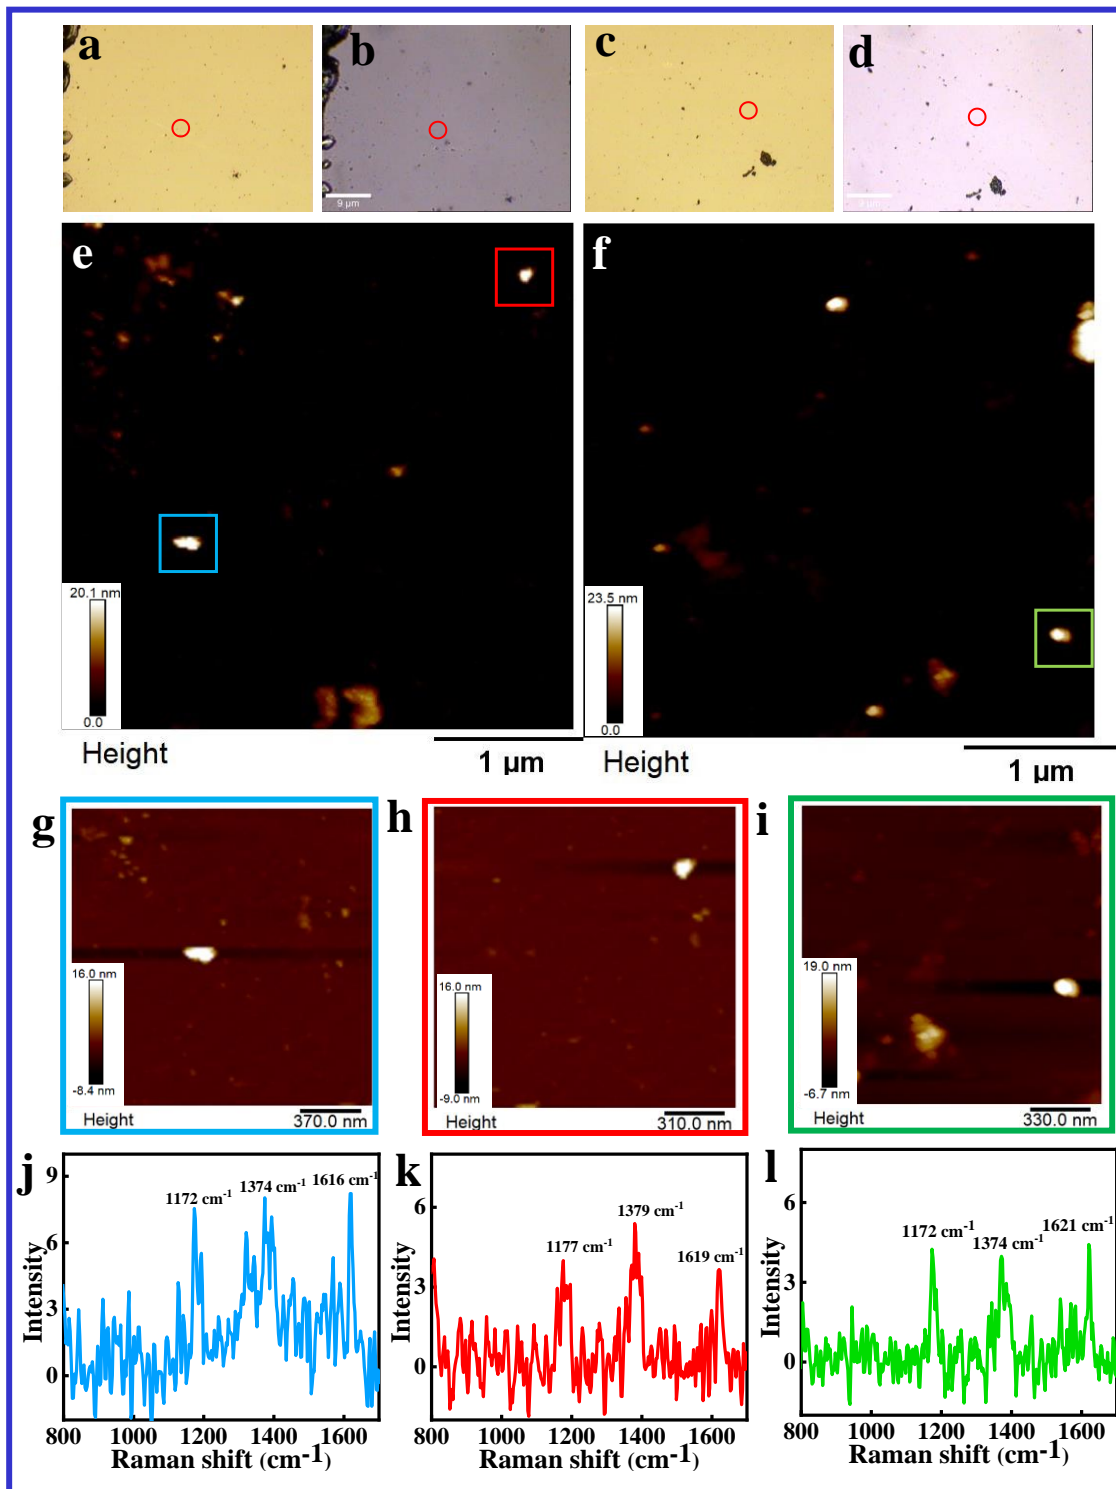

**Figure S15.** Single-molecule SERS measurements of ThT dye using Au NBPs nanoantenna. Optical image recorded using ((a), (c)) AFM, and ((b), (d)) confocal Raman microscopes (red circles show the scanned area), respectively ((e), (f)) AFM images, ((g), (h), and (i)) high resolution AFM image of a single nanoantenna structure, and ((j), (k), and (l)) their corresponding single-molecule SERS spectra.

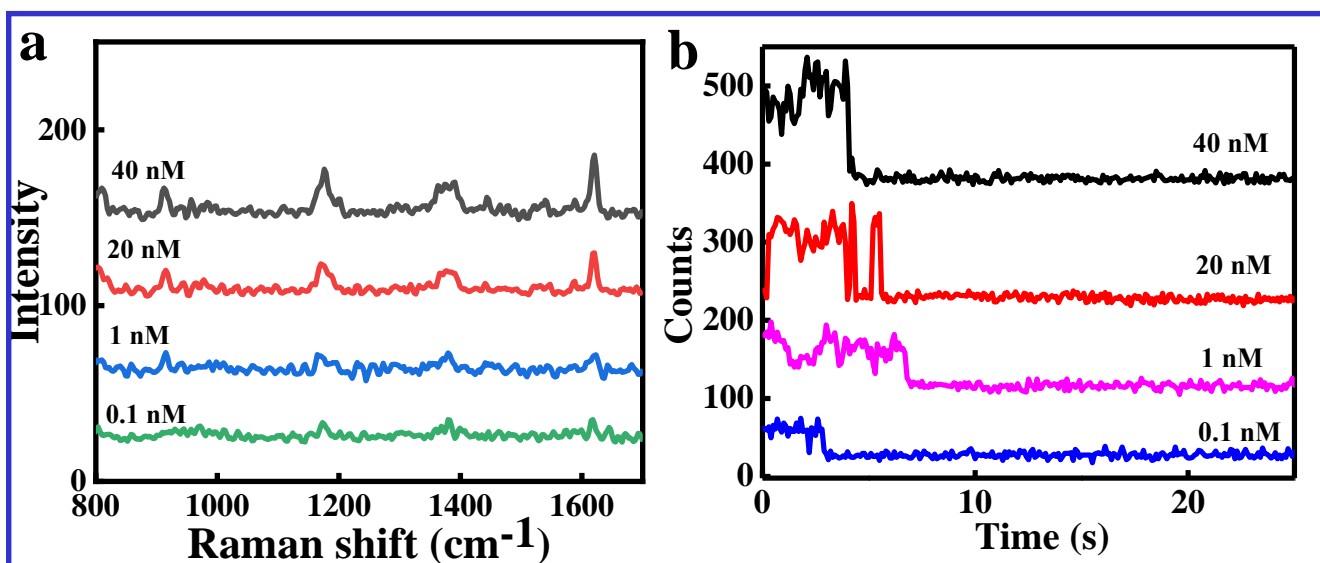

**Figure S16.** Concentration dependent (a) SERS, and (b) single molecule confocal fluorescence measurements of ThT dye using Au NBPs monomer.

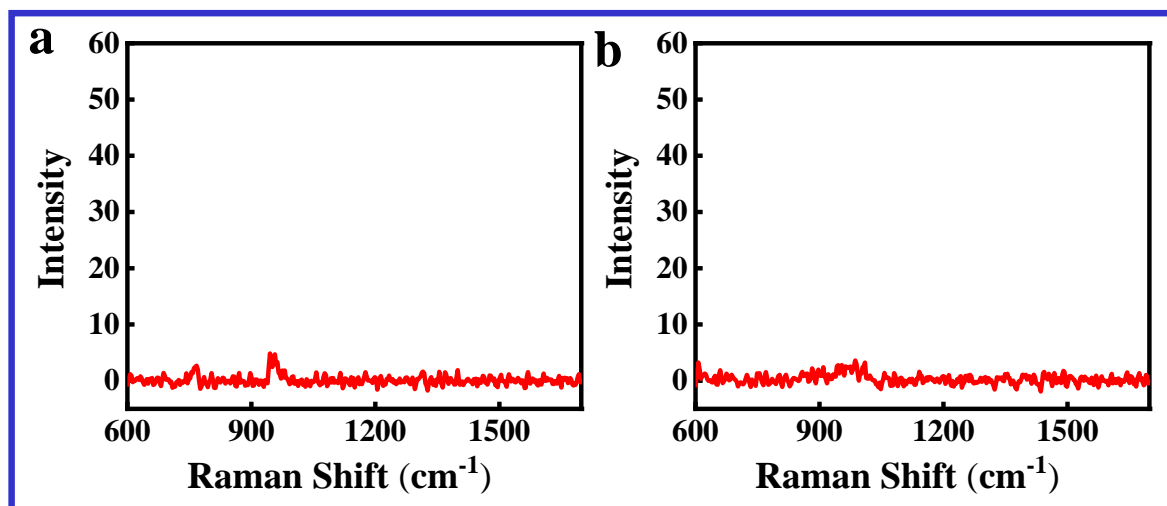

**Figure S17.** (a), and (b) Control Raman measurements using ThT on DNA origami (without Au NBPs).

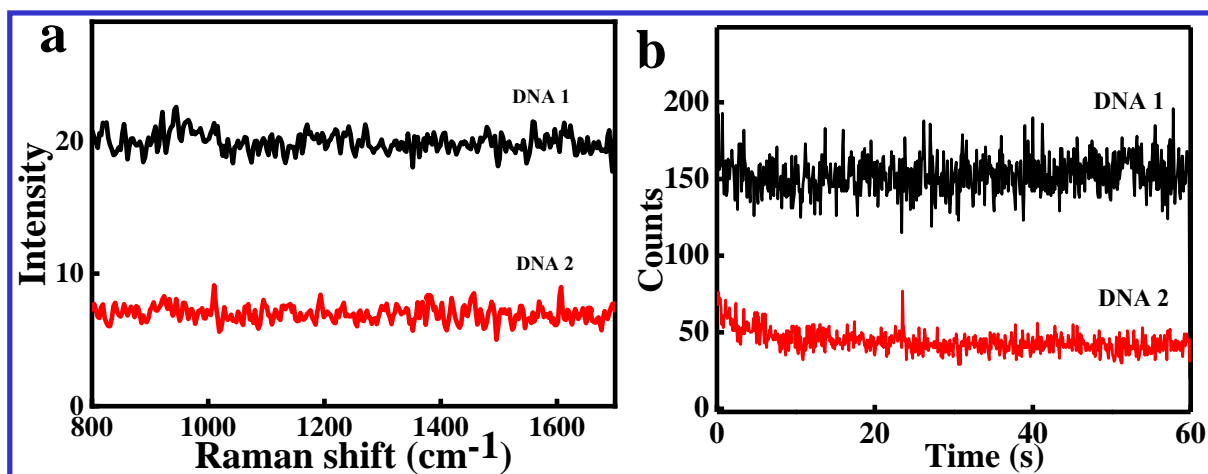

**Figure S18.** Control (a) Raman spectra, and (b) single molecule fluorescence time traces of ThT dye solution (0.1 nM) using different DNA sequences on DNA origami.

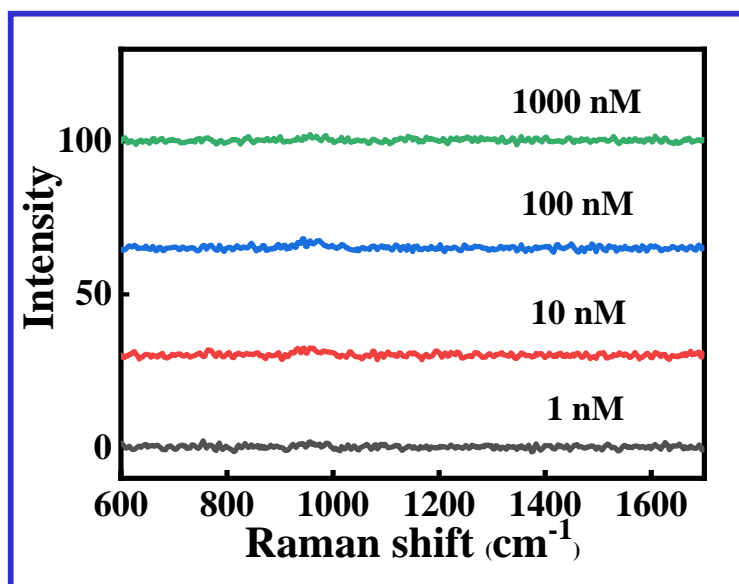

**Figure S19.** Raman measurements of different concentrations of ThT on Si wafer.

## References

1. E. Lopez-Tobar, M. Antalík, D. Jancura, M. V. Cañamares, A. García-Leis, D. Fedunova, G. Fabriciova and S. Sanchez-Cortes, *The Journal of Physical Chemistry C*, 2013, **117**, 3996-4005.
2. N. Maiti, R. Chadha, A. Das and S. Kapoor, *Spectrochim Acta A Mol Biomol Spectrosc*, 2015, **149**, 949-956.
